# Supplementary material for: A Case Study of Eukaryogenesis: The Evolution of Photoreception by Photolyase/Cryptochrome Proteins
Source: PubMed Central journal article supplement (PMC7560933; doi:10.1007/s00239-020-09965-x), 2020-09-26

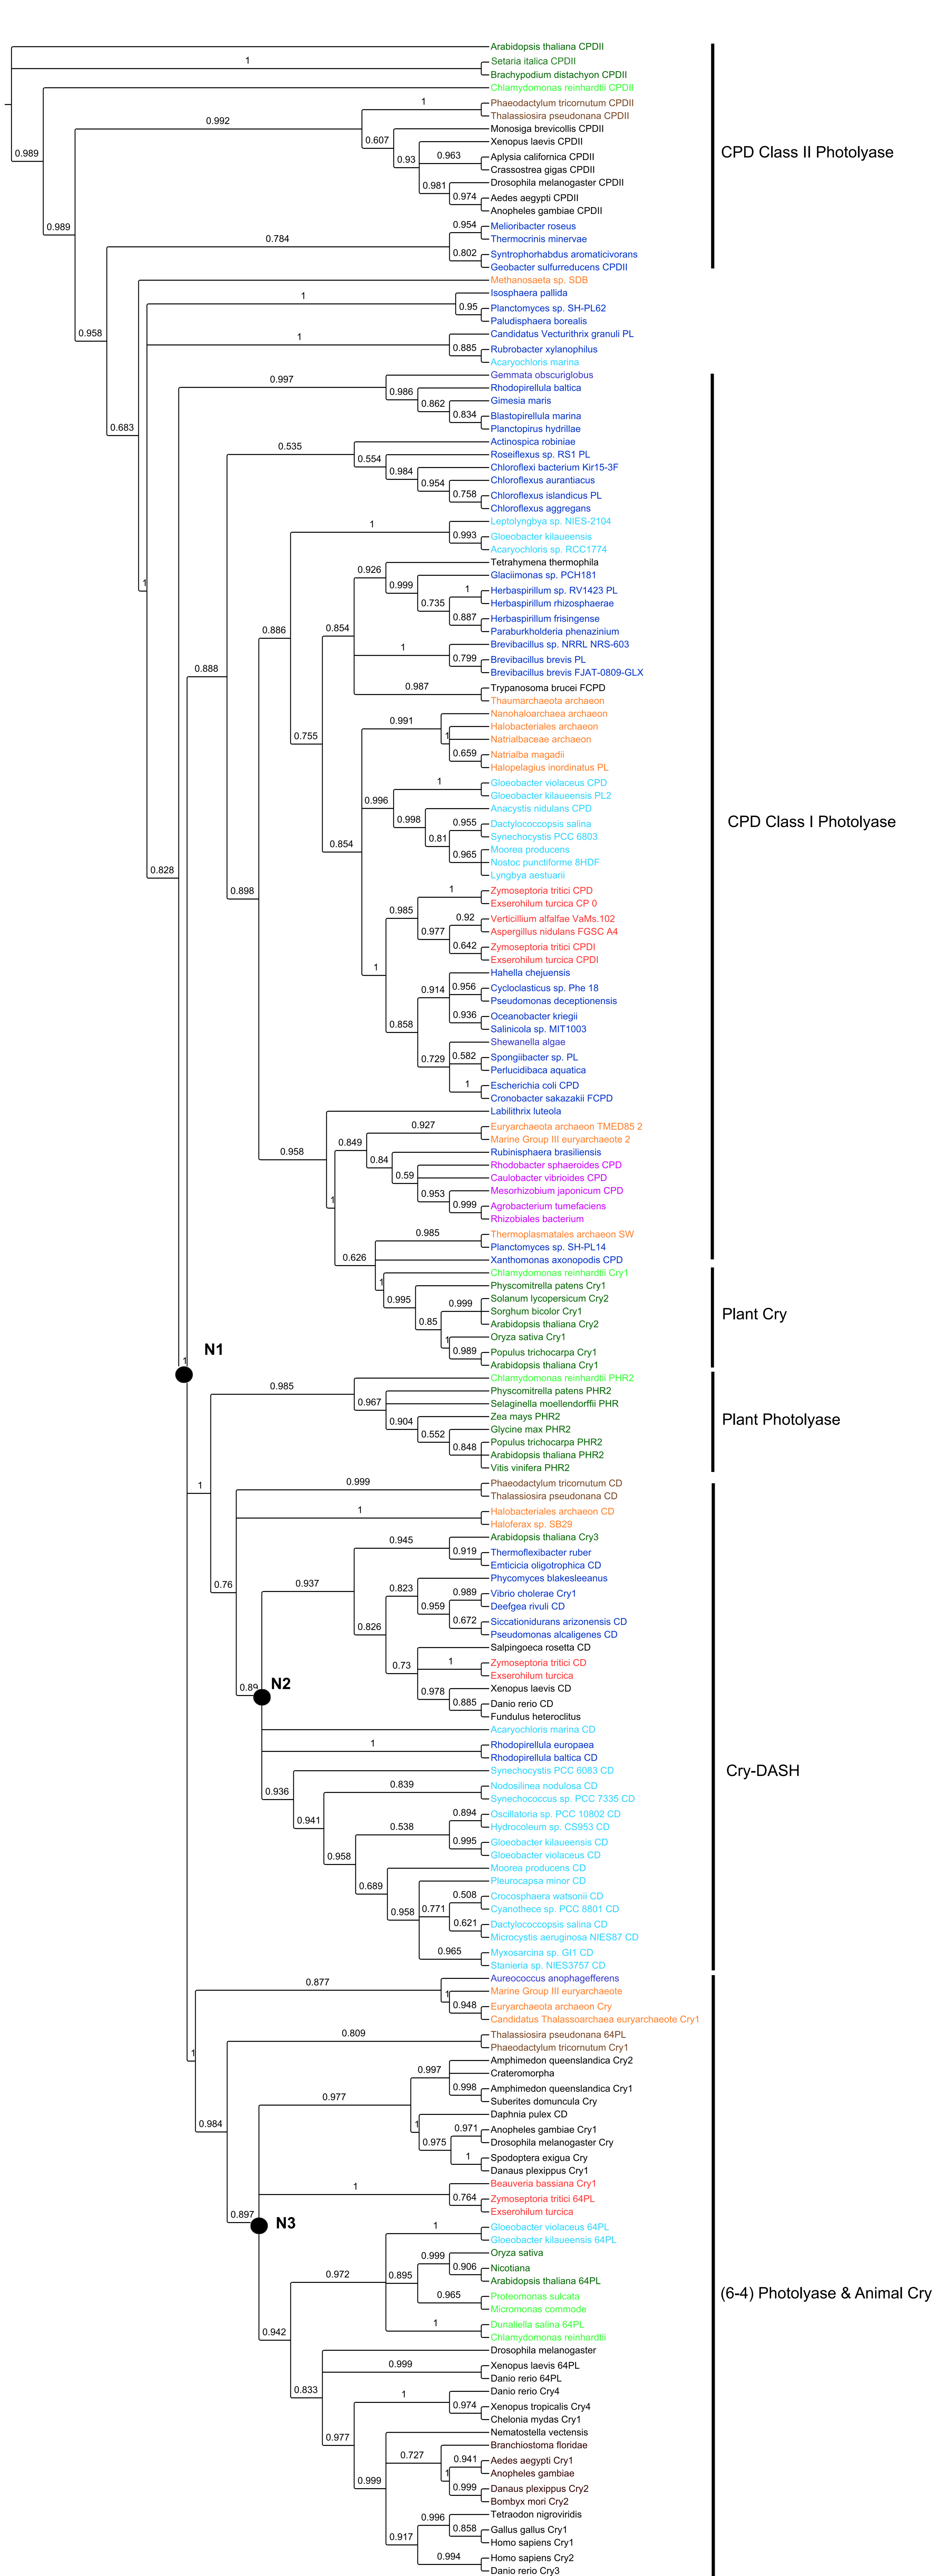

Supplement: 239_2020_9965_MOESM2_ESM.pdf [file 239_2020_9965_MOESM2_ESM.pdf]
